# Supplementary material for: Identification of a Novel Gene, Osbht, in Response to High Temperature Tolerance at Booting Stage in Rice
Source: Int J Mol Sci. 2020 Aug 15;21(16):5862. doi: 10.3390/ijms21165862 (PMC7461545; doi:10.3390/ijms21165862)
Supplement: Supplementary file 1 [file ijms-21-05862-s001.pdf]

**Table S1.** Twenty-seven candidate genes identified between the RM212 and RM3411 markers and their ORFs, which include various proteins related to heat tolerance.

| Marker interval | Function      | Locus        | Description                                                | No. of genes |
|-----------------|---------------|--------------|------------------------------------------------------------|--------------|
| RM212-RM1297    | Cell function | Os01g0748000 | A protein that fuses vesicles to the cytoplasmic membrane  | 1            |
|                 |               | Os01g0748500 | Lipolytic enzyme, G-D-S-L family protein                   | 1            |
|                 |               | Os01g0748900 | Membrane attack complex C9 family protein                  | 2            |
|                 |               | Os01g0749400 | HAD-superfamily hydrolase subfamily IIB protein            | 3            |
|                 |               | Os01g0750300 | Similar to Cellulose synthase                              | 3            |
|                 |               | Os01g0752200 | Enoyl-CoA hydratase/isomerase domain-containing protein    | 1            |
|                 |               | Os01g0752300 | Similar to 60S ribosomal protein L18a-1                    | 1            |
|                 |               | Os01g0753000 | Colicin E3, catalytic domain-containing protein            | 1            |
|                 |               | Os01g0754200 | Glycosyl transferase, family 48 protein                    | 5            |
|                 | Hormone       | Os01g0750400 | Leucine-rich repeat, plant-specific containing protein     | 1            |
|                 |               | Os01g0752100 | Cyclin-like F-box domain-containing protein                | 1            |
|                 |               | Os01g0753100 | Alcohol dehydrogenase superfamily, zinc-containing protein | 2            |
|                 |               | Os01g0753500 | Transcriptional factor B3 family protein                   | 1            |

|               |              |                                                       |   |
|---------------|--------------|-------------------------------------------------------|---|
|               | Os01g0756200 | Similar to VirE2-interacting protein VIP1             | 1 |
|               | Os01g0757200 | Similar to GA 2-oxidase 4                             | 5 |
| Plant defense | Os01g0750100 | Similar to WRKY transcription factor                  | 3 |
|               | Os01g0752600 | Glycosyl transferase, family 19 protein               | 1 |
|               | Os01g0754600 | Prenyltransferase domain-containing protein           | 1 |
|               | Os01g0755700 | RING-type domain-containing protein                   | 1 |
|               | Os01g0756700 | Similar to Potassium channel                          | 1 |
|               | Os01g0752500 | Similar to Ethylene-responsive transcription factor 6 | 1 |
| Kinase        | Os01g0748600 | Protein kinase domain-containing protein              | 2 |
|               | Os01g0752400 | Similar to Glucosidase II beta subunit precursor      | 1 |
| Heat-shock    | Os01g0749300 | Similar to Heat-shock factor                          | 2 |
|               | Os01g0757500 | HSP20-like chaperone-domain-containing protein        | 2 |
| Signaling     | Os01g0750000 | Similar to Ras-related protein RIC2                   | 3 |
|               | Os01g0752700 | Similar to GTP-binding protein                        | 1 |

**Table S2.** Environmental settings for high temperature treatment in the indoor growth chamber.

| Step | Time        | Duration (min) | Temperature (°C) | RH(%) | Light ( $\mu\text{mol m}^{-2}\text{s}^{-1}$ ) |
|------|-------------|----------------|------------------|-------|-----------------------------------------------|
| 1    | 06:30-07:00 | 30             | 27               | 75    | 330                                           |
| 2    | 07:00-07:30 | 30             | 30               | 75    | 460                                           |
| 3    | 07:30-08:00 | 30             | 35               | 70    | 580                                           |
| 4    | 08:00-08:30 | 30             | 38               | 70    | 580                                           |
| 5    | 08:30-14:30 | 360            | 42               | 70    | 580                                           |
| 6    | 14:30-15:30 | 60             | 35               | 70    | 580                                           |
| 7    | 15:30-16:30 | 60             | 30               | 70    | 580                                           |
| 8    | 16:30-17:30 | 60             | 27               | 75    | 460                                           |
| 9    | 17:30-18:30 | 60             | 24               | 75    | 330                                           |
| 10   | 18:30-06:30 | 720            | 24               | 75    | 0                                             |

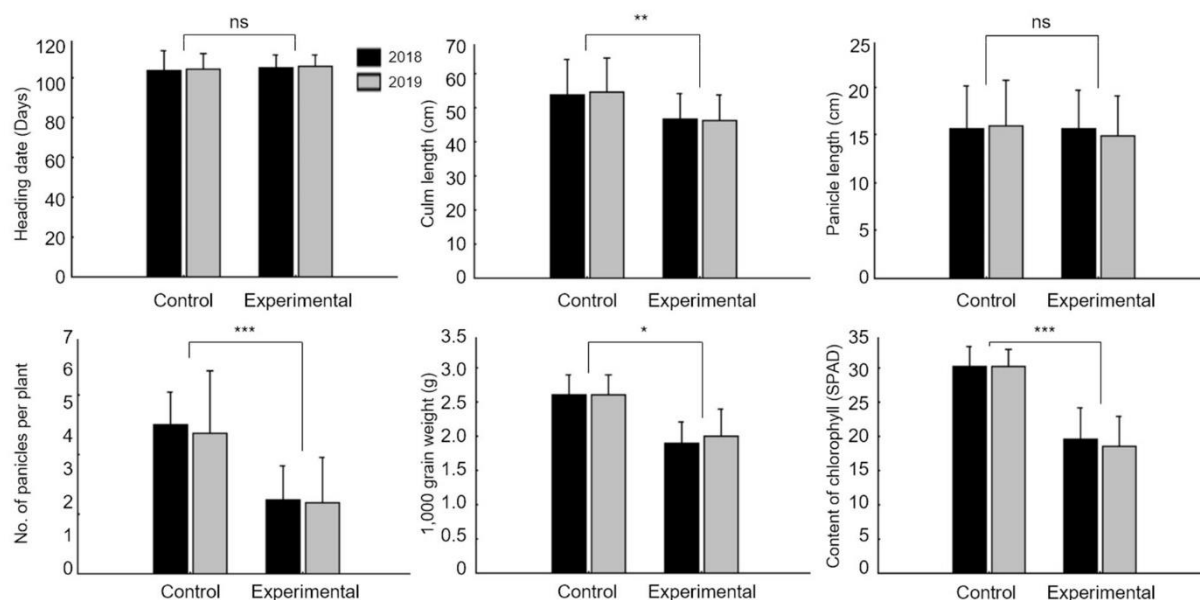

**Figure S1. Comparison of agricultural traits of control and experimental groups when the rice in booting stage was treatment to high temperature.** There was no significant difference in heading date and panicle length when booting stage was treated with high temperature. However, culm length ( $P < 0.01$ ), number of panicle ( $P < 0.001$ ), 1,000 grain weight ( $P < 0.05$ ), and content of chlorophyll ( $P < 0.001$ ) were significantly different between the control and experimental groups after high temperature treatment in booting stage. ns, non-specific; \*, means significant at 0.05 level; \*\*, means significant at 0.01 level; \*\*\*, means significant at 0.001 level.

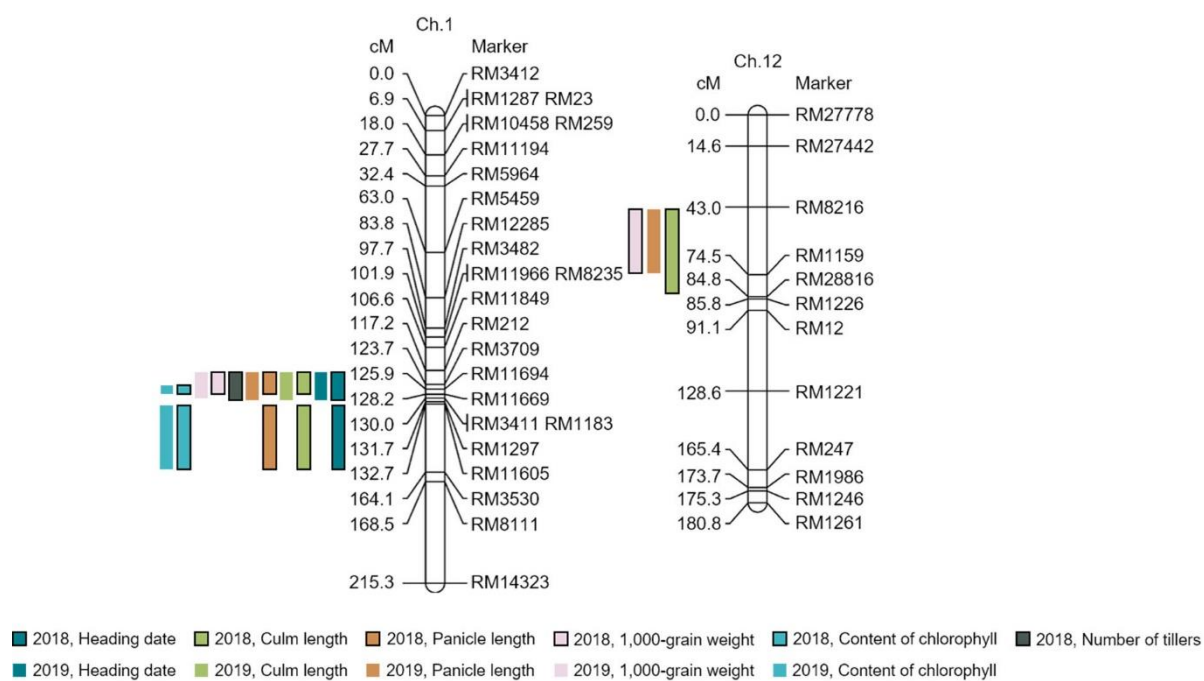

**Figure S2. The chromosomal location of QTLs associated with heat tolerance in CNDH population.**

The QTLs mapped in chromosome 1 and chromosome 12. And QTLs for all traits related to heat tolerance is commonly located in RM3709-RM11694 of chromosome 1.
